# Supplementary material for: Exploring the functional soil-microbe interface and exoenzymes through soil metaexoproteomics
Source: PubMed Central journal article supplement — ISME J. 2014 Jul 18;8(10):2148–50. doi: 10.1038/ismej.2014.130 (PMC4184004; doi:10.1038/ismej.2014.130), 2014-07-18

## Suspension and agitation of soil

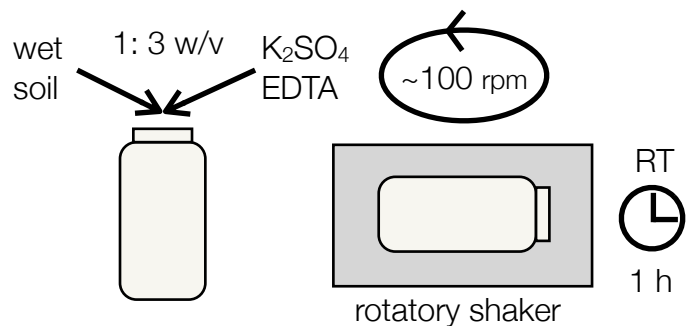

## Removal of soil particulates and cells

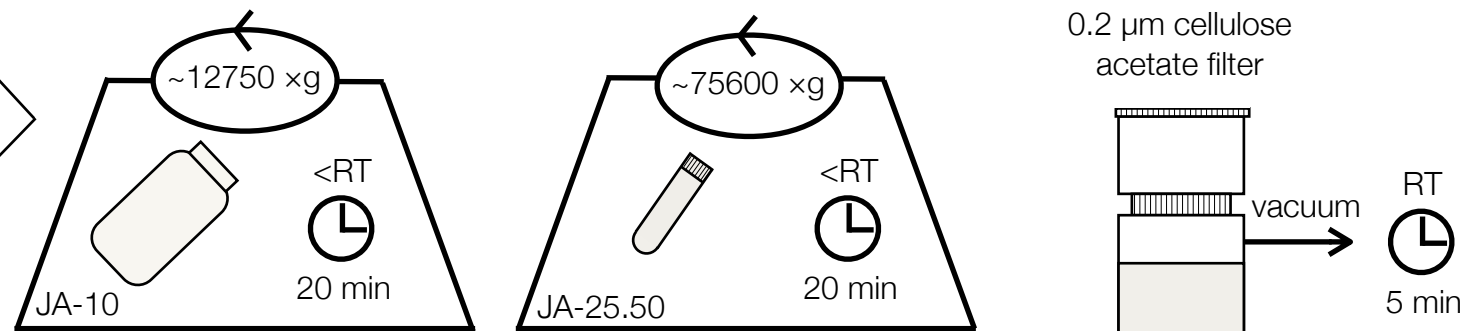

## Analysis

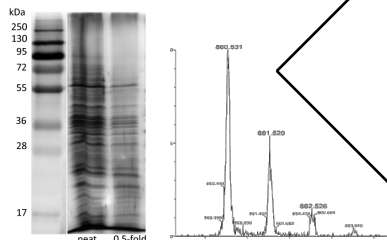

## Ultrafiltration and centrifugal concentration

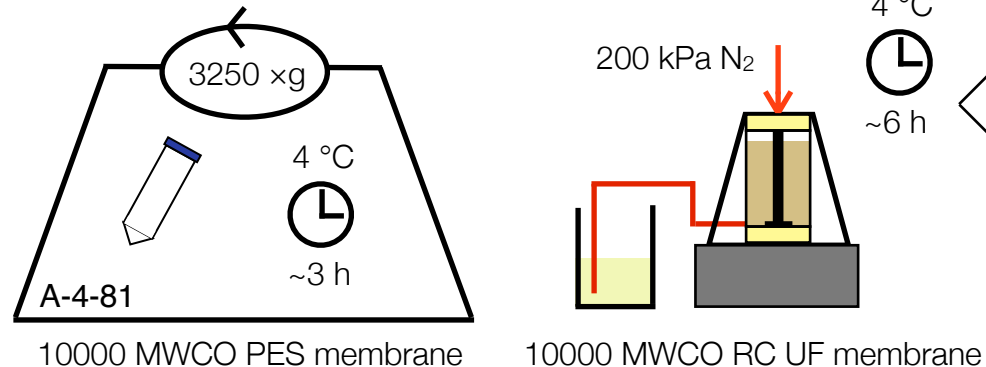

## Dialysis

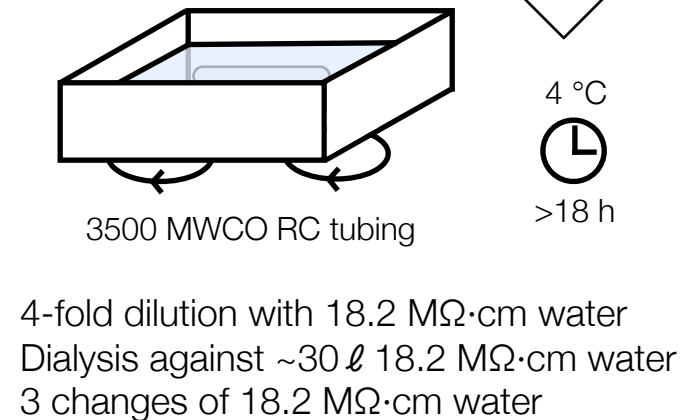

Supplement: ismej2014130x1.pdf [file ismej2014130x1.pdf]
